# Supplementary material for: Rare Germline Mutations Identified by Targeted Next-Generation Sequencing of Susceptibility Genes in Pheochromocytoma and Paraganglioma
Source: Oxford University Press journal article supplement (doi:10.1210/jc.2013-4375), 2014-04-02
Supplement: jc-13-4375.pdf [file jc-13-4375.pdf]

## **Supplemental Information**

---

### **Supplementary Materials and Methods**

#### Samples from PCC and PGL patients

Tumor samples (72 PCCs and 14 PGLs) were obtained from 86 unselected patients operated at the Karolinska University Hospital, Stockholm, Sweden, during the period 1986-2011. Clinical data for subsets of the cases have been previously published (1-3) and are detailed here in Table S1. Eighteen of the tumors were from patients with a known syndromic form of the disease (nine MEN2A, two VHL, three NF1) or a known mutation (four with *SDHB* mutation (1)). The remaining tumors (58 PCCs and 10 PGLs) were from apparently sporadic cases, i.e. non-familial and without syndromic features.

Tumors were histopathologically diagnosed as PCC or PGL in the routine setting according to the WHO classification (4). All cases were retrospectively characterized concerning gender, age at surgery, plasma- or urine hormone levels prior to surgery, tumor location, weight and size, associated syndrome, other diseases, follow-up time and outcome (Table S1). Tumor malignancy was assessed based on the presence of metastasis according to the WHO criteria (4) as well as by incorporating extensive local invasion from the AFIP criteria (5). Frozen tissue samples were collected through an established biobank system where an experienced endocrine pathologist identified the tumor and normal tissue macroscopically. Included samples had been snap-frozen in liquid nitrogen after surgery and stored in -80°C without thawing. For tumors with identified mutations, corresponding blood samples or normal frozen or paraffin-embedded tissue was obtained whenever available.

As additional sensitivity controls, three PCC samples with known *NFI* alterations from a previous study (6) were included in the NGS analysis: one with a germline mutation, one with a somatic mutation and one with a whole-gene deletion of *NFI* but no detected point mutation.

All samples were collected and studied with informed consent and approval from the local ethic committees.

#### DNA and RNA preparation

DNA was extracted from frozen tissue samples using a DNeasy Blood and tissue kit (Qiagen) and from blood samples using a Blood DNA Midi kit (Qiagen). Tumor DNA samples were quantified using a Quant-iT PicoGreen dsDNA assay (Invitrogen) with fluorescence measured in a VICTOR<sup>3</sup> plate reader (PerkinElmer) and a standard curve prepared from lambda DNA (Invitrogen). Samples were diluted to 50 ng/μl prior to enrichment and sequencing.

Total RNA was extracted from frozen tumor samples using a *mirVana* miRNA Isolation Kit (Ambion, Life technologies). RNA samples were quantified using NanoDrop spectrophotometer (ND-1000).

RNA quality was measured using a Bioanalyzer 2100 (Agilent) which showed RNA Integrity Numbers (RIN) >7 for samples included in the study (RIN values for subsets of cases have been previously published (7)). One micro gram of total RNA was transcribed into cDNA with the Maxima First Strand cDNA synthesis kit (Thermo Scientific).

#### Library preparation and next-generation sequencing

Probes for targeted sequencing with the TruSeq Custom Amplicon kit (Illumina) were designed to cover the genes *EGLN1*, *KIF1B*, *MAX*, *MEN1*, *NF1*, *RET*, *SDHA*, *SDHB*, *SDHC*, *SDHD*, *SDHAF2*, *TMEM127* and *VHL* (Table S2 and S3) including exon-intron boundaries, using the online DesignStudio software (Illumina). For *RET*, the hot-spot exons 8, 10, 11, 13, 14, 15 and 16 (8) were targeted. In all, the targeted regions included 176 exons and specific probes could be designed for 99% of the target sequence, but design was not possible for exons 9 and 10 of *MEN1* which therefore had to be excluded. A built-in function was used to avoid known SNPs in the probe sites. In total, the custom-designed oligo pool contained probes for 272 amplicons with an average length of 250 bp (longer exons were covered by overlapping amplicons). For each sample, 250 ng of DNA was used for library preparation. The DNA library was prepared according to the manufacturer's protocol which included oligo probe hybridization to genomic DNA, extension-ligation of the bound oligos, PCR-amplification of the extension-ligation products with addition of barcodes for multiplexing, and finally normalization and pooling of samples. Two library pools of 48 samples, each including one Illumina TruSeq control sample, were prepared and sequenced in two separate runs on a MiSeq sequencer (Illumina), using 2x150 bp paired end reads. In total, 96 samples were sequenced (86 from the study cohort, three *NF1*-mutated sensitivity controls, two Illumina controls and five patient samples for clinical genetic testing, not included in this research study). Obtained raw sequencing data is available upon request.

#### Bioinformatical analysis

Alignment of NGS data to the human reference genome, UCSC hg19, and variant calling, including annotation of known SNPs, were performed in the MiSeq Reporter Software v. 2.1.43 (Illumina), using the Smith-Waterman algorithm and the Somatic Variant Caller algorithm, respectively. The threshold for insertions and deletions allowed during the alignment was increased from the default value of 25 bp to 100 bp. This was done to increase the capacity to detect larger insertions and deletions, as we noted that these were otherwise missed or incorrectly aligned and annotated. However, it should be noted that the length of detectable insertions and deletions is still limited by the read length of the technology. Quality and variant evaluation was performed in the Amplicon Viewer software v. 1.1.0 (Illumina). Sequence variants that were detected in more than 10% of the reads of one sample were checked against all samples and then against Ensembl to investigate potential mutation effect (e.g. amino acid substitution) and population frequencies. Common polymorphisms, silent sequence variants and missense variants that were reported in the HapMap or 1000 Genomes projects were excluded, except for very rare (allele frequency  $\leq 0.02$ ) missense variants which are listed separately (Table S4). Remaining variants were classified as mutations. Their effects were predicted with two different algorithms: PolyPhen-2 (9) and MutationTaster (10). Deletions or insertions were double-checked by exporting alignment (.bam) files for inspection of sequence reads in Integrative Genomics Viewer v. 2.3.8 (11).

### Statistical analysis

Statistical analyses were carried out in GraphPad Prism v. 6.02. Student's t-test was performed to compare the age of patients with and without germline mutations. For further analysis of age and tumor weight, analysis of variance (ANOVA) was used to test for differences in means between genotype groups. If significant, a post-hoc test with Tukey correction for multiple comparisons was performed to compare pairs of groups. For categorical data (malignancy, tumor type and hormone levels), Fisher's exact test was performed to compare each group that showed a trend (e.g. malignancy in *SDHB*-mutated cases) against the rest of the cohort. Hormone levels were also compared after grouping tumors into two groups (Cluster 1: *VHL/SDHx/EPAS1* and Cluster 2: *RET/NF1/TMEM127/KIF1B $\beta$* ) based on their genotype, according to the previous knowledge of gene expression patterns (12-16). Significance was accepted at P-values <0.05.

### Sanger sequencing

Direct Sanger sequencing was applied to validate mutations in tumor DNA and to investigate mutational status in corresponding constitutional DNA from blood or normal tissue samples. Primer design was aided by the Primer3 software (17), and care was taken to avoid SNPs (reported in Ensembl) in the primer sites. Amplification of known pseudogenes was avoided by specificity-screening in the BiSearch software (18). Approximately 30 ng of DNA was PCR-amplified for 35 cycles using HotStar Taq Polymerase (Qiagen) and PCR products were purified with ExoSAP-IT (GE Healthcare). Dideoxynucleotide chain termination was performed using BigDye Terminator 3.1 (Applied Biosystems) and capillary electrophoresis was performed on a 3500 Genetic Analyzer (Applied Biosystems). Sequences were analyzed by visual inspection in Sequence Scanner v. 1.0 (Applied Biosystems) and by alignment to the Ensembl sequence using the NCBI BLAST tool. In cases of probable or potential splice-site mutations, *NF1* cDNA was sequenced as previously described (6). Sanger sequencing was also applied for exon 1 and exon 8 of *NF1* for which the MiSeq sequencing did not yield results (Table S5). As the involvement of the *EPAS1* gene was not known when we designed our NGS assay, the mutation-prone exons 9 and 12 of *EPAS1* were analyzed separately with Sanger sequencing, using previously described methodology (unpublished data, revised manuscript under review). In one case with two different *EPAS1* mutations, cloning and sequencing of *EPAS1* cDNA was performed to determine if the mutations occurred in *cis* or *trans*, using previously described methodology (6).

Mutations detected in constitutional DNA are termed "germline mutations" throughout the paper, though it should be noted that it is unknown whether they were inherited or *de novo* and whether they are present in the germ cells.

**Table S1.** Details of cases included in the study.

| Case ID | Mutation(s)        | Gender | Age at surgery | Syndrome | Tumor weight [g] | Tumor size [cm] | EPI <sup>a</sup> | NE <sup>a</sup> | DA <sup>a</sup> | Tumor type | Malignancy |        | Metastasis (M) or relapse | Multi-focal | Other cancers or polycythemia | Follow up time [months] | Outcome | CIMP            |
|---------|--------------------|--------|----------------|----------|------------------|-----------------|------------------|-----------------|-----------------|------------|------------|--------|---------------------------|-------------|-------------------------------|-------------------------|---------|-----------------|
|         |                    |        |                |          |                  |                 |                  |                 |                 |            | AFIP       | WHO    |                           |             |                               |                         |         |                 |
| 1       |                    | F      | 58             |          | 1350             | 16x10x4         | E                | E               | -               | PCC        | Benign     | Benign |                           |             | Not found                     | >200+                   | AWOD    | No <sup>c</sup> |
| 2       |                    | F      | 22             |          | 133              | 5x5x6           | N                | N               | N               | PCC        | Benign     | Benign |                           |             | Not found                     | >200+                   | AWOD    | No <sup>c</sup> |
| 3       |                    | F      | 46             |          | 640              | 10x10x9         | E                | E               | -               | PCC        | Benign     | Benign |                           |             | DCIS                          | >200+                   | AWOD    | No <sup>c</sup> |
| 4       |                    | F      | 69             |          | 22               | 3x3x4           | N                | E               | -               | PCC        | Benign     | Benign |                           |             | Not found                     | 192                     | DOC     | No <sup>c</sup> |
| 5       | <i>RET</i>         | M      | 53             | MEN2A    | 32               | 3x3x4           | N                | E               | -               | PCC        | Benign     | Benign |                           | Bilateral   | MTC                           | >200+                   | AWOD    | No <sup>b</sup> |
| 6       |                    | F      | 44             |          | -                | 2x2x1           | N                | E               | -               | PCC        | Benign     | Benign |                           |             | IDC                           | >200+                   | AWOD    | No <sup>c</sup> |
| 7       | <i>KIF1Bβ</i>      | F      | 54             |          | 16               | 3x3x2.5         | N                | E               | -               | PCC        | Benign     | Benign |                           |             | Endometrial carcinoma         | >200+                   | AWOD    | No <sup>c</sup> |
| 8       | <i>NF1</i>         | M      | 59             | NF1      | 12               | 1.5x2x2         | E                | N               | -               | PCC        | Benign     | Benign |                           |             | Fibromas                      | 144                     | DOC     | No <sup>c</sup> |
| 9       |                    | F      | 56             |          | 11               | 1.5x2x2         | N                | N               | -               | PCC        | Malignant  | Benign |                           |             | Mesotelioma                   | 1                       | DOC     | No <sup>b</sup> |
| 10      |                    | F      | 75             |          | 19               | 2x3x3           | N                | E               | -               | PCC        | Benign     | Benign |                           |             | Melanoma                      | 132                     | DOC     | No <sup>c</sup> |
| 11      |                    | M      | 45             |          | 22               | 3x3.5x3         | E                | E               | -               | PCC        | Benign     | Benign |                           |             | Not found                     | >200+                   | AWOD    | No <sup>c</sup> |
| 12      |                    | M      | 48             |          | 1993             | 15x13x9         | E                | E               | E               | PCC        | Benign     | Benign |                           |             | Not found                     | >200+                   | AWOD    | No <sup>c</sup> |
| 13      | <i>RET</i>         | F      | 45             | MEN2A    | 21               | 3x2x2           | -                | -               | -               | PCC        | Benign     | Benign |                           | Bilateral   | MTC                           | >200+                   | AWOD    | No <sup>c</sup> |
| 14      |                    | F      | 52             |          | 74               | 5.5x5.5x3.5     | -                | -               | -               | PCC        | Benign     | Benign |                           |             | Leiomyoma                     | >200+                   | AWOD    | No <sup>c</sup> |
| 15      |                    | F      | 37             |          | 59               | -               | E                | E               | N               | PCC        | Benign     | Benign |                           |             | Not found                     | >200+                   | AWOD    | No <sup>c</sup> |
| 16      |                    | F      | 30             |          | 34               | 6x3.5x3.5       | N                | E               | N               | PCC        | Benign     | Benign |                           |             | Not found                     | 228                     | AWOD    | No <sup>c</sup> |
| 17      |                    | M      | 58             |          | 59               | 7.5x7.5x3.5     | N                | E               | -               | PCC        | Benign     | Benign |                           |             | Not found                     | >200+                   | AWOD    | No <sup>c</sup> |
| 18      | <i>NF1, KIF1Bβ</i> | F      | 46             | NF1      | 54               | 4x4.5x4.5       | E                | E               | -               | PCC        | Benign     | Benign |                           |             | Fibromas                      | 240                     | DOC     | No <sup>b</sup> |
| 19      |                    | M      | 37             |          | 135              | 10x5x5.5        | E                | E               | N               | PCC        | Benign     | Benign |                           |             | Seminoma                      | >200+                   | AWOD    | Not run         |
| 20      | <i>NF1</i>         | F      | 68             |          | 23               | 3.5x3x2         | -                | -               | -               | PCC        | Benign     | Benign |                           |             | Not found                     | 72                      | DOC     | No <sup>c</sup> |
| 21      | <i>VHL</i>         | M      | 31             | VHL      | 25               | 4x3x2.5         | N                | N               | N               | PCC        | Benign     | Benign |                           |             | Not found                     | 1                       | AWOD    | No <sup>c</sup> |
| 22      |                    | M      | 35             |          | 7                | 2x2x2           | E                | N               | -               | PCC        | Benign     | Benign |                           |             | Basal-cell carcinoma          | >200+                   | AWOD    | Not run         |
| 23      | <i>RET</i>         | F      | 41             | MEN2A    | 4                | 4x2x1           | E                | N               | -               | PCC        | Benign     | Benign |                           |             | MTC                           | >200+                   | AWOD    | No <sup>b</sup> |
| 24      | <i>NF1</i>         | F      | 74             |          | -                | 5x3x2           | -                | -               | -               | PCC        | Benign     | Benign |                           |             | PHPT, CLL, IDC                | 132                     | DOC     | No <sup>c</sup> |
| 25      | <i>VHL</i>         | M      | 13             | VHL      | 42               | 5x5x3           | N                | N               | -               | PCC        | Malignant  | Benign |                           |             | Not found                     | >200+                   | AWOD    | No <sup>c</sup> |
| 26      | <i>RET</i>         | F      | 65             |          | -                | 6x5x5.5         | -                | -               | -               | PCC        | Benign     | Benign |                           |             | Not found                     | >200+                   | AWOD    | No <sup>c</sup> |
| 28      |                    | F      | 77             |          | 314              | 10x10x7         | -                | -               | -               | PCC        | Malignant  | Benign |                           |             | Not found                     | 84                      | DOC     | No <sup>c</sup> |

|    |                 |   |    |       |     |             |   |   |   |     |           |           |                     |           |                                                           |       |      |                 |
|----|-----------------|---|----|-------|-----|-------------|---|---|---|-----|-----------|-----------|---------------------|-----------|-----------------------------------------------------------|-------|------|-----------------|
| 29 | <i>RET</i>      | F | 47 |       | 32  | 4.5x4x3     | N | N | N | PCC | Benign    | Benign    |                     |           | MTC,<br>mucoepi-<br>dermoid<br>carcinoma<br>(salivary gl) | >200+ | AWOD | No <sup>c</sup> |
| 30 | <i>RET</i>      | F | 44 | MEN2A | 3   | 2.5x2.5x2   | N | E | N | PCC | Benign    | Benign    |                     |           | MTC                                                       | >200+ | AWOD | No <sup>b</sup> |
| 31 | <i>RET</i>      | F | 34 | MEN2A | 29  | 5x0.5x2     | - | - | - | PCC | Benign    | Benign    |                     |           | MTC                                                       | >200+ | AWOD | No <sup>b</sup> |
| 32 |                 | F | 44 |       | 7   | 6x5.5x6.5   | N | E | E | PCC | Malignant | Malignant | M: 5 years<br>later |           | Not found                                                 | >200+ | AWOD | No <sup>c</sup> |
| 34 | <i>RET</i>      | M | 41 | MEN2A | 183 | 5x5x5       | E | E | N | PCC | Benign    | Benign    |                     | Bilateral | MTC,<br>PHPT, PCC<br>x3                                   | 192+  | AWOD | No <sup>c</sup> |
| 36 |                 | M | 40 |       | 434 | 11x10x9     | E | E | E | PCC | Malignant | Malignant | M:<br>Simultaneous  |           | Not found                                                 | 0     | DOD  | No <sup>c</sup> |
| 37 |                 | F | 52 |       | 38  | 4x3.5x3     | E | E | N | PCC | Benign    | Benign    |                     |           | Not found                                                 | 192+  | AWOD | No <sup>c</sup> |
| 38 | <i>NF1</i>      | M | 53 |       | 33  | 3x3x3       | E | E | N | PCC | Benign    | Benign    |                     |           | Not found                                                 | 190+  | AWOD | No <sup>c</sup> |
| 39 | <i>NF1</i>      | F | 69 |       | 22  | 3x3x0.5     | E | N | N | PCC | Malignant | Benign    |                     |           | Not found                                                 | 168+  | AWOD | No <sup>c</sup> |
| 43 | <i>RET</i>      | M | 69 |       | 85  | 4.5x6.5x4   | N | - | N | PCC | Benign    | Benign    |                     |           | Not found                                                 | 168+  | AWOD | No <sup>c</sup> |
| 44 | <i>NF1</i>      | F | 50 |       | 17  | 2x1.5x2     | N | N | N | PCC | Benign    | Benign    |                     |           | Not found                                                 | 156+  | AWOD | No <sup>c</sup> |
| 46 |                 | F | 73 |       | 66  | -           | N | N | N | PCC | Benign    | Benign    |                     |           | Melanoma                                                  | 144+  | AWOD | No <sup>c</sup> |
| 47 | <i>NF1</i>      | M | 63 |       | 17  | 2x2x2.5     | N | E | N | PCC | Benign    | Benign    |                     |           | Not found                                                 | 144+  | AWOD | Not run         |
| 48 | <i>NF1</i>      | M | 52 | NF1   | 165 | 8x8x6       | N | N | E | PCC | Benign    | Benign    |                     |           | Fibromas,<br>PHPT                                         | 132+  | AWOD | No <sup>c</sup> |
| 49 |                 | M | 76 |       | 78  | 4.5x4.5x4.5 | N | N | N | PCC | Benign    | Benign    |                     |           | Basal-cell<br>carcinoma                                   | 132   | DOC  | No <sup>c</sup> |
| 50 |                 | M | 66 |       | 26  | 4x3x2.5     | E | E | N | PCC | Benign    | Benign    |                     |           | Prostate<br>carcinoma                                     | 132+  | AWOD | No <sup>c</sup> |
| 51 |                 | F | 65 |       | 10  | 2x2x2       | N | E | - | PCC | Malignant | Benign    |                     |           | Not found                                                 | 132+  | AWOD | No <sup>b</sup> |
| 52 | <i>NF1</i>      | M | 45 |       | 16  | 2.5x1.5x1   | N | E | - | PCC | Benign    | Benign    |                     |           | Not found                                                 | 132+  | AWOD | Not run         |
| 58 |                 | M | 27 |       | 172 | 9x5x4.5     | E | E | - | PCC | Benign    | Benign    |                     |           | Not found                                                 | 108+  | AWOD | No <sup>c</sup> |
| 61 | <i>NF1</i>      | F | 74 |       | 90  | 6x7x5       | N | E | - | PCC | Benign    | Benign    |                     |           | Basal-cell<br>carcinoma                                   | 108+  | AWOD | Not run         |
| 62 |                 | F | 64 |       | 15  | 4.2x3x1.8   | N | E | - | PCC | Benign    | Benign    |                     |           | IDC,<br>melanoma                                          | 108+  | AWOD | Not run         |
| 63 | <i>RET</i>      | F | 45 | MEN2A | 19  | 7x3.5x2.5   | N | E | - | PCC | Benign    | Benign    |                     |           | MTC                                                       | 96+   | AWOD | Not run         |
| 64 | <i>RET</i>      | M | 74 |       | 11  | 1.8x2x1.6   | N | E | - | PCC | Benign    | Benign    |                     |           | Not found                                                 | 96+   | AWOD | Not run         |
| 65 |                 | M | 39 |       | 33  | 2.5x3x2.5   | N | N | - | PCC | Benign    | Benign    |                     |           | Not found                                                 | 96+   | AWOD | Not run         |
| 71 |                 | M | 65 |       | 23  | 2x2x2       | N | E | - | PCC | Benign    | Benign    |                     |           | Not found                                                 | 84+   | AWOD | Not run         |
| 72 | <i>RET, NF1</i> | F | 30 | MEN2A | 7   | 1.6x3x1     | E | E | - | PCC | Benign    | Benign    | Relapse             |           | MTC, PCC<br>relapse                                       | 84+   | AWOD | Not run         |

|     |                         |   |    |       |     |             |   |   |   |     |           |           |                    |          |                                     |       |      |                   |
|-----|-------------------------|---|----|-------|-----|-------------|---|---|---|-----|-----------|-----------|--------------------|----------|-------------------------------------|-------|------|-------------------|
| 74  |                         | M | 76 |       | 14  | 2x2x2       | N | E | - | PCC | Malignant | Benign    |                    |          | Not found                           | 72+   | AWOD | No <sup>b</sup>   |
| 77  | <i>NFI</i>              | M | 66 |       | 29  | 2x2x2       | E | E | - | PCC | Benign    | Benign    |                    |          | Not found                           | 60+   | AWOD | Not run           |
| 81  | <i>RET</i>              | M | 33 | MEN2A | 10  | 2x2x2       | E | E | - | PCC | Benign    | Benign    |                    |          | MTC                                 | 48+   | AWOD | Not run           |
| 82  | <i>EPASI</i>            | F | 64 |       | 11  | 1x1x1       | N | E | - | PCC | Benign    | Benign    |                    |          | Colon adenoma                       | 48+   | AWOD | Not run           |
| 83  | <i>NFI</i>              | F | 41 |       | 245 | 12x8x8      | N | N | - | PCC | Benign    | Benign    |                    |          | Not found                           | 48+   | AWOD | Not run           |
| 84  |                         | M | 71 |       | 263 | 11x7x5      | N | E | - | PCC | Benign    | Benign    |                    |          | Renal-cell carcinoma                | 40+   | AWOD | Not run           |
| 85  |                         | F | 62 |       | 31  | 5.5x4x2.5   | N | E | - | PCC | Malignant | Benign    |                    |          | Endometrial carcinoma               | 40+   | AWOD | No <sup>b</sup>   |
| 86  | <i>NFI, MAX</i>         | F | 57 |       | 22  | 6.5x3.5x2   | E | E | - | PCC | Benign    | Benign    |                    |          | Not found                           | 36+   | AWOD | Not run           |
| 87  | <i>TMEM127</i>          | F | 55 |       | 48  | 5.5x4x2.5   | N | E | - | PCC | Benign    | Benign    |                    |          | Not found                           | 36+   | AWOD | Not run           |
| 88  |                         | M | 73 |       | 151 | 7x6x5       | E | E | - | PCC | Benign    | Benign    |                    |          | Not found                           | 36+   | AWOD | Not run           |
| 89  | <i>NFI</i>              | F | 36 |       | 28  | 6x4x3       | E | E | - | PCC | Benign    | Benign    |                    |          | Not found                           | 36+   | AWOD | Not run           |
| 90  |                         | M | 51 |       | 17  | 7x3.5x1.5   | N | E | - | PCC | Benign    | Benign    |                    |          | Not found                           | 36+   | AWOD | Not run           |
| 91  |                         | M | 46 |       | 40  | 4x3x3       | N | E | - | PCC | Benign    | Benign    |                    |          | Not found                           | 30+   | AWOD | Not run           |
| 92  |                         | F | 57 |       | 31  | 4.5x3.7x2.3 | N | E | - | PCC | Benign    | Benign    |                    |          | Not found                           | 30+   | AWOD | Not run           |
| 93  | <i>NFI</i>              | F | 57 |       | -   | 6x4.5x3.5   | E | E | - | PCC | Benign    | Benign    |                    |          | Not found                           | 30+   | AWOD | Not run           |
| 94  | <i>EPASI</i>            | M | 67 |       | -   | 4.2x3.8x2.8 | N | E | - | PCC | Benign    | Benign    |                    |          | PCV, meningioma, duodenal carcinoma | 30+   | AWOD | Not run           |
| 95  | <i>SDHA</i>             | M | 64 |       | 66  | 6x5x3       | N | E | - | PCC | Benign    | Benign    |                    |          | Not found                           | 24+   | AWOD | Not run           |
| 96  | <i>SDHA, VHL, EGLN1</i> | M | 47 |       | 23  | 3.6x2.5x1.6 | - | - | - | PCC | Benign    | Benign    |                    |          | Not found                           | 24+   | AWOD | Not run           |
| 97  |                         | F | 53 |       | 51  | 6x5x4       | E | E | - | PCC | Benign    | Benign    |                    |          | Not found                           | 18+   | AWOD | Not run           |
| 100 |                         | M | 26 |       | 50  | 3x3x3       | - | - | - | PGL | Malignant | Malignant | M:<br>Simultaneous |          | Not found                           | 0     | DOC  | No <sup>c</sup>   |
| 101 | <i>SDHB</i>             | M | 14 |       | 26  | 4.5x3.5x2   | N | E | - | PGL | Benign    | Benign    |                    |          | Not found                           | >200  | AWOD | CIMP <sup>c</sup> |
| 102 | <i>SDHB</i>             | F | 41 |       | 103 | 7x7.5x3.5   | N | E | E | PGL | Malignant | Malignant | M: 4 years later   |          | Not found                           | 156   | DOC  | CIMP <sup>c</sup> |
| 103 | <i>SDHB</i>             | M | 25 |       | 16  | 4.5x2x2x    | N | E | N | PGL | Malignant | Benign    | Relapse            |          | PGL relapse                         | >200+ | AWOD | CIMP <sup>c</sup> |
| 104 |                         | F | 57 |       | 75  | 7x6x4.5     | E | E | N | PGL | Malignant | Benign    |                    |          | Not found                           | >200+ | AWOD | No <sup>c</sup>   |
| 105 | <i>SDHB</i>             | F | 35 |       | -   | 3x2x3       | N | N | N | PGL | Malignant | Malignant | M: 12 years later  |          | Cholesteatomas x 3                  | >200+ | AWOD | No <sup>b</sup>   |
| 106 | <i>EPASI</i>            | M | 24 |       | 23  | 5x3.5x3     | N | N | N | PGL | Benign    | Benign    |                    | Multiple | PCV                                 | >200+ | AWOD | No <sup>c</sup>   |
| 107 | <i>EPASI</i>            | M | 73 |       | 13  | 2.5x4.5x2   | N | E | N | PGL | Benign    | Benign    |                    |          | Rectal carcinoma                    | 192   | DOC  | No <sup>c</sup>   |

|     |              |   |    |  |     |           |   |   |   |     |           |           |                     |          |                      |      |      |                   |
|-----|--------------|---|----|--|-----|-----------|---|---|---|-----|-----------|-----------|---------------------|----------|----------------------|------|------|-------------------|
| 108 | <i>VHL</i>   | F | 65 |  | 47  | 5.5x3x3   | N | E | N | PGL | Malignant | Benign    |                     |          | Basal-cell carcinoma | 144  | AWOD | No <sup>c</sup>   |
| 109 | <i>EPASI</i> | M | 46 |  | 8   | 3x2x2     | E | E | N | PGL | Benign    | Benign    |                     |          | Not found            | 72   | AWOD | No <sup>c</sup>   |
| 110 |              | F | 27 |  | 15  | 2x3x3     | - | - | - | PGL | Malignant | Malignant | M:<br>Simultaneous  |          | Not found            | 50   | DOD  | No <sup>b</sup>   |
| 111 |              | M | 61 |  | 36  | 4.5x4x3   | E | E | E | PGL | Malignant | Benign    |                     |          | Not found            | 144+ | AWOD | No <sup>b</sup>   |
| 113 | <i>SDHB</i>  | M | 26 |  | 11  | 4x3x3     | N | E | E | PGL | Malignant | Malignant | M:<br>Simultaneous  | Multiple | Not found            | 24   | DOD  | CIMP <sup>c</sup> |
| 112 |              | M | 42 |  | 173 | 5x4.5x2.5 | - | - | - | PGL | Malignant | Malignant | M: 4 years<br>later |          | Not found            | 168  | DOC  | CIMP <sup>c</sup> |

AFIP, malignancy according to AFIP (5); AWOD, alive with no evidence of disease; CIMP, CpG island methylator phenotype; CLL, chronic lymphoid leukemia; DA, dopamine levels in urine before surgery; DCIS, ductal carcinoma in situ ; DOC, dead of other cause; DOD, dead of disease; E, elevated; EPI, epinephrine levels in plasma or urine before surgery; F, female; IDC, invasive ductal carcinoma; M, male; MEN 2A, multiple endocrine neoplasia type 2A; MTC, medullary thyroid carcinoma; NE, norepinephrine levels in plasma or urine before surgery; NF1, neurofibromatosis type 1 (von Recklinghausen syndrome); N, normal; PCC, pheochromocytoma; PCV, polycythemia vera; PGL, paraganglioma; PHPT, primary hyperparathyroidism; VHL, von Hippel-Lindau syndrome; WHO, malignancy according to WHO (4); +, persisted follow-up; -, no value.

<sup>a</sup>Since different methods had been used for measurements of hormone levels during the period, each case was classified as having a “normal” or “elevated” level according to the appropriate reference value for each method. <sup>b</sup>Published in reference (1). <sup>c</sup>Published in reference (19).

**Table S2.** Details of genes included in the study.

| Gene                           | Full official gene name (according to NCBI)                                  | Chromosomal location | Number of exons | Coding sequence [nt] | Protein name (according to NCBI)                                                             |
|--------------------------------|------------------------------------------------------------------------------|----------------------|-----------------|----------------------|----------------------------------------------------------------------------------------------|
| <i>EGLN1</i> ( <i>PHD2</i> )   | Egl-9 family hypoxia-inducible factor 1                                      | 1q42.1               | 5               | 1281                 | Egl nine homolog 1 (also known as HIF prolyl hydroxylase 2)                                  |
| <i>EPAS1</i> ( <i>HIF2A</i> )  | Endothelial PAS domain protein 1                                             | 2p.21                | 16              | 2613                 | Endothelial PAS domain-containing protein 1 (also known as Hypoxia-inducible factor 2 alpha) |
| <i>KIF1B<math>\beta</math></i> | Kinesin family member 1B ( $\beta$ )                                         | 1p36.22              | 47              | 5313                 | Kinesin-like protein KIF1B, Beta                                                             |
| <i>MAX</i>                     | MYC associated factor X                                                      | 14q23.3              | 5               | 483                  | Protein MAX                                                                                  |
| <i>MEN1</i>                    | Multiple endocrine neoplasia I                                               | 11q13.1              | 10              | 1833                 | Menin                                                                                        |
| <i>NFI</i>                     | Neurofibromin 1                                                              | 17q11.2              | 58              | 8520                 | Neurofibromin                                                                                |
| <i>RET</i>                     | RET proto-oncogene                                                           | 10q11.21             | 20              | 3345                 | Proto-oncogene tyrosine-protein kinase receptor Ret                                          |
| <i>SDHA</i>                    | Succinate dehydrogenase complex, subunit A, flavoprotein                     | 5p15.33              | 15              | 1995                 | Succinate dehydrogenase [ubiquinone] flavoprotein subunit, mitochondrial                     |
| <i>SDHB</i>                    | Succinate dehydrogenase complex, subunit B, iron sulfur                      | 1p36.13              | 8               | 843                  | Succinate dehydrogenase [ubiquinone] iron-sulfur subunit, mitochondrial                      |
| <i>SDHC</i>                    | Succinate dehydrogenase complex, subunit C, integral membrane protein, 15kDa | 1q23.3               | 6               | 510                  | Succinate dehydrogenase cytochrome b560 subunit, mitochondrial                               |
| <i>SDHD</i>                    | Succinate dehydrogenase complex, subunit D, integral membrane protein        | 11q23.1              | 4               | 480                  | Succinate dehydrogenase [ubiquinone] cytochrome b small subunit, mitochondrial               |
| <i>SDHAF2</i> ( <i>SDH5</i> )  | Succinate dehydrogenase complex assembly factor 2                            | 11q12.2              | 4               | 501                  | Succinate dehydrogenase assembly factor 2, mitochondrial                                     |
| <i>TMEM127</i>                 | Transmembrane protein 127                                                    | 2q11.2               | 4               | 717                  | Transmembrane protein 127                                                                    |
| <i>VHL</i>                     | von Hippel-Lindau tumor suppressor, E3 ubiquitin protein ligase              | 3p25.3               | 3               | 642                  | von Hippel-Lindau disease tumor suppressor                                                   |

nt, nucleotides.



**Table S3.** Summary of probe design for targeted regions from DesignStudio (Illumina).

| Target                | Chr | Start [bp] | Stop [bp] | Length [bp] | Padding <sup>a</sup> [bp] | Amplicons | Avoid SNPs | Coverage [%] | DS score | Comment                   |
|-----------------------|-----|------------|-----------|-------------|---------------------------|-----------|------------|--------------|----------|---------------------------|
| KIF1B_Exon_2063862    | 1   | 10270764   | 10270936  | 173         | 15                        | 2         | Yes        | 100          | 60       |                           |
| KIF1B_Exon_2063781    | 1   | 10292308   | 10292492  | 185         | 15                        | 2         | Yes        | 100          | 87       |                           |
| KIF1B_Exon_2063698    | 1   | 10316305   | 10316381  | 77          | 15                        | 1         | Yes        | 100          | 80       |                           |
| KIF1B_Exon_2064531    | 1   | 10318551   | 10318730  | 180         | 15                        | 2         | Yes        | 100          | 98       |                           |
| KIF1B_Exon_2061430    | 1   | 10321963   | 10322028  | 66          | 15                        | 1         | Yes        | 100          | 96       |                           |
| KIF1B_Exon_2063952    | 1   | 10327438   | 10327616  | 179         | 15                        | 2         | Yes        | 100          | 88       |                           |
| KIF1B_Exon_2061933    | 1   | 10328210   | 10328321  | 112         | 15                        | 1         | Yes        | 100          | 96       |                           |
| KIF1B_Exon_2061861    | 1   | 10331560   | 10331637  | 78          | 15                        | 1         | Yes        | 100          | 96       |                           |
| KIF1B_Exon_2064043    | 1   | 10332299   | 10332364  | 66          | 15                        | 1         | Yes        | 100          | 95       |                           |
| KIF1B_Exon_2062103    | 1   | 10335486   | 10335561  | 76          | 15                        | 1         | Yes        | 100          | 96       |                           |
| KIF1B_Exon_2061688    | 1   | 10336379   | 10336457  | 79          | 15                        | 1         | Yes        | 100          | 96       |                           |
| KIF1B_Exon_2062104    | 1   | 10338044   | 10338186  | 143         | 15                        | 1         | Yes        | 100          | 95       |                           |
| KIF1B_Exon_2061862    | 1   | 10342458   | 10342591  | 134         | 15                        | 1         | Yes        | 100          | 96       |                           |
| KIF1B_Exon_2062105    | 1   | 10351140   | 10351219  | 80          | 15                        | 1         | Yes        | 100          | 96       |                           |
| KIF1B_Exon_2063782    | 1   | 10352105   | 10352180  | 76          | 10                        | 1         | Yes        | 100          | 96       |                           |
| KIF1B_Exon_2063953    | 1   | 10355144   | 10355223  | 80          | 15                        | 1         | Yes        | 100          | 96       |                           |
| KIF1B_Exon_2064044    | 1   | 10355718   | 10355824  | 107         | 15                        | 1         | Yes        | 100          | 80       |                           |
| KIF1B_custom-merged   | 1   | 10356630   | 10357314  | 685         |                           | 5         | Yes        | 100          | 94       |                           |
| KIF1B_Exon_2207886    | 1   | 10380101   | 10380194  | 94          | 15                        | 1         | Yes        | 100          | 98       |                           |
| KIF1B_Exon_2208477    | 1   | 10381767   | 10381915  | 149         | 10                        | 1         | Yes        | 100          | 96       |                           |
| KIF1B_Exon_2209899    | 1   | 10383942   | 10384120  | 179         | 20                        | 2         | Yes        | 100          | 96       |                           |
| KIF1B_Exon_2209740    | 1   | 10384816   | 10384953  | 138         | 15                        | 2         | Yes        | 100          | 98       |                           |
| KIF1B_Exon_2209900    | 1   | 10386169   | 10386417  | 249         | 10                        | 2         | Yes        | 100          | 80       |                           |
| KIF1B_Exon_2208478    | 1   | 10394578   | 10394696  | 119         | 15                        | 1         | Yes        | 100          | 96       |                           |
| KIF1B_Exon_2208055    | 1   | 10396715   | 10396800  | 86          | 15                        | 1         | Yes        | 100          | 96       |                           |
| KIF1B_custom-merged   | 1   | 10397112   | 10397611  | 500         |                           | 4         | Yes        | 100          | 83       |                           |
| KIF1B_Exon_2209741    | 1   | 10399827   | 10399917  | 91          | 15                        | 1         | Yes        | 100          | 96       |                           |
| KIF1B_Exon_2207465    | 1   | 10402108   | 10402226  | 119         | 15                        | 1         | Yes        | 100          | 95       |                           |
| KIF1B_Exon_2207716    | 1   | 10403290   | 10403345  | 56          | 15                        | 1         | Yes        | 100          | 96       |                           |
| KIF1B_Exon_2207386    | 1   | 10405903   | 10406011  | 109         | 15                        | 1         | Yes        | 100          | 96       |                           |
| KIF1B_Exon_2209990    | 1   | 10407819   | 10407885  | 67          | 15                        | 1         | Yes        | 100          | 96       |                           |
| KIF1B_Exon_2208143    | 1   | 10408707   | 10408791  | 85          | 15                        | 1         | No         | 100          | 80       | SNPs allowed <sup>b</sup> |
| KIF1B_Exon_2207387    | 1   | 10412689   | 10412794  | 106         | 15                        | 1         | Yes        | 100          | 80       |                           |
| KIF1B_Exon_2207717    | 1   | 10420987   | 10421101  | 115         | 15                        | 1         | Yes        | 100          | 96       |                           |
| KIF1B_Exon_2207388    | 1   | 10421750   | 10421883  | 134         | 15                        | 1         | Yes        | 100          | 96       |                           |
| KIF1B_Exon_2207887    | 1   | 10423291   | 10423452  | 162         | 0                         | 1         | Yes        | 70           | 96       |                           |
| KIF1B_custom-merged   | 1   | 10425148   | 10425716  | 569         |                           | 3         | Yes        | 91           | 96       |                           |
| KIF1B_Exon_2207888    | 1   | 10428525   | 10428596  | 72          | 15                        | 1         | Yes        | 100          | 96       |                           |
| KIF1B_Exon_2209991    | 1   | 10431199   | 10431320  | 122         | 15                        | 1         | Yes        | 100          | 96       |                           |
| KIF1B_Exon_2207889    | 1   | 10434374   | 10434523  | 150         | 15                        | 1         | Yes        | 100          | 96       |                           |
| KIF1B_custom-merged   | 1   | 10434897   | 10435446  | 550         |                           | 3         | Yes        | 90           | 90       |                           |
| KIF1B_3' Exon_2207389 | 1   | 10436603   | 10436720  | 118         | 15                        | 1         | Yes        | 100          | 96       |                           |
| SDHB_Exon_1959892     | 1   | 17345225   | 17345453  | 229         | 15                        | 2         | Yes        | 100          | 79       |                           |
| SDHB_Exon_1959132     | 1   | 17349103   | 17349225  | 123         | 15                        | 1         | Yes        | 100          | 96       |                           |
| SDHB_Exon_1959133     | 1   | 17350468   | 17350569  | 102         | 15                        | 1         | Yes        | 100          | 96       |                           |
| SDHB_Exon_1959893     | 1   | 17354244   | 17354360  | 117         | 15                        | 1         | Yes        | 100          | 95       |                           |
| SDHB_Exon_1957709     | 1   | 17355095   | 17355231  | 137         | 15                        | 1         | Yes        | 100          | 96       |                           |
| SDHB_Exon_1959973     | 1   | 17359555   | 17359640  | 86          | 15                        | 1         | Yes        | 100          | 96       |                           |
| SDHB_Exon_1957299     | 1   | 17371256   | 17371383  | 128         | 15                        | 1         | Yes        | 100          | 95       |                           |
| SDHB_Exon_1957375     | 1   | 17380443   | 17380665  | 223         | 15                        | 2         | Yes        | 100          | 60       |                           |
| SDHC_Exon_1841603     | 1   | 161284166  | 161284215 | 50          | 15                        | 1         | Yes        | 100          | 60       |                           |
| SDHC_Exon1843529      | 1   | 161293218  | 161293466 | 249         | 0                         | 1         | Yes        | 84           | 60       |                           |
| SDHC_Exon_1841262     | 1   | 161298186  | 161298287 | 102         | 10                        | 1         | Yes        | 100          | 96       |                           |
| SDHC_Exon_1841957     | 1   | 161310384  | 161310445 | 62          | 15                        | 1         | Yes        | 100          | 96       |                           |

|                                                         |    |           |           |      |    |   |     |     |    |                       |
|---------------------------------------------------------|----|-----------|-----------|------|----|---|-----|-----|----|-----------------------|
| SDHC_Exon_1841263                                       | 1  | 161326467 | 161326630 | 164  | 10 | 1 | Yes | 100 | 96 |                       |
| SDHC_3'_Exon_1841958                                    | 1  | 161332119 | 161332300 | 182  | 15 | 2 | Yes | 100 | 78 |                       |
| EGLN1_3'_Exon_2158355                                   | 1  | 231502110 | 231502221 | 112  | 15 | 1 | Yes | 100 | 95 |                       |
| EGLN1_Exon_2156091                                      | 1  | 231503315 | 231503382 | 68   | 15 | 1 | Yes | 100 | 95 |                       |
| EGLN1_Exon_2158356                                      | 1  | 231506308 | 231506444 | 137  | 15 | 1 | Yes | 100 | 96 |                       |
| EGLN1_Exon_2156335                                      | 1  | 231509726 | 231509845 | 120  | 15 | 1 | Yes | 100 | 96 |                       |
| EGLN1_ex1_Exon_2155751                                  | 1  | 231556744 | 231557743 | 1000 | 15 | 7 | Yes | 100 | 63 |                       |
| TMEM127_3prim_Exon_2091697                              | 2  | 96919349  | 96919853  | 505  | 17 | 4 | Yes | 100 | 88 |                       |
| TMEM127_Exon_2088569                                    | 2  | 96920571  | 96920735  | 165  | 15 | 2 | Yes | 100 | 78 |                       |
| TMEM127_Exon_2088570                                    | 2  | 96930876  | 96931250  | 375  | 15 | 3 | Yes | 100 | 66 |                       |
| TMEM127_Exon_2088836                                    | 2  | 96931607  | 96931751  | 145  | 15 | 1 | Yes | 100 | 60 |                       |
| VHL_Exon_2011217                                        | 3  | 10183320  | 10183871  | 552  | 15 | 3 | Yes | 100 | 60 |                       |
| VHL_Exon_2267839                                        | 3  | 10188198  | 10188320  | 123  | 15 | 1 | Yes | 100 | 96 |                       |
| VHL_3'_Exon_2011555                                     | 3  | 10191471  | 10191710  | 240  | 15 | 2 | Yes | 100 | 89 |                       |
| SDHA_Exon_2025897                                       | 5  | 218356    | 218533    | 178  | 15 | 2 | Yes | 100 | 60 |                       |
| SDHA_Exon_2025898                                       | 5  | 223597    | 223683    | 87   | 15 | 1 | Yes | 100 | 96 |                       |
| SDHA_Exon_2024462                                       | 5  | 224475    | 224636    | 162  | 15 | 2 | Yes | 100 | 60 |                       |
| SDHA_Exon_2026918                                       | 5  | 225534    | 225677    | 144  | 15 | 1 | Yes | 100 | 96 |                       |
| SDHA_Exon_2024320                                       | 5  | 225998    | 226162    | 165  | 15 | 1 | Yes | 100 | 80 |                       |
| SDHA_Exon_2024321                                       | 5  | 228300    | 228448    | 149  | 10 | 2 | Yes | 100 | 98 |                       |
| SDHA_Exon_2024896                                       | 5  | 230991    | 231115    | 125  | 10 | 1 | Yes | 100 | 96 |                       |
| SDHA_Exon_2025899                                       | 5  | 233592    | 233760    | 169  | 20 | 2 | Yes | 100 | 79 |                       |
| SDHA_Exon_2024572                                       | 5  | 235259    | 235454    | 196  | 15 | 2 | Yes | 100 | 80 |                       |
| SDHA_Exon_2027785                                       | 5  | 236543    | 236714    | 172  | 10 | 1 | Yes | 100 | 96 |                       |
| SDHA_Exon_2027199                                       | 5  | 240473    | 240591    | 119  | 10 | 1 | Yes | 100 | 96 |                       |
| SDHA_custom-merged                                      | 5  | 251092    | 251598    | 507  |    | 4 | Yes | 100 | 74 |                       |
| SDHA_Exon_2024897                                       | 5  | 254508    | 254621    | 114  | 10 | 1 | Yes | 100 | 96 |                       |
| SDHA_Exon_2024322                                       | 5  | 256449    | 256814    | 366  | 15 | 3 | Yes | 100 | 79 |                       |
| RET_Exon_1929860                                        | 10 | 43607547  | 43607672  | 126  | 9  | 1 | Yes | 100 | 60 |                       |
| RET_Exon_1929009                                        | 10 | 43609004  | 43609123  | 120  | 9  | 1 | Yes | 100 | 80 |                       |
| RET_Exon_1931470                                        | 10 | 43609928  | 43610184  | 257  | 9  | 2 | Yes | 100 | 60 |                       |
| RET_Exon_1927266                                        | 10 | 43613821  | 43613928  | 108  | 9  | 1 | Yes | 100 | 96 |                       |
| RET_Exon_1927505                                        | 10 | 43614979  | 43615193  | 215  | 6  | 2 | Yes | 100 | 80 |                       |
| RET_Exon_1927181                                        | 10 | 43615529  | 43615651  | 123  | 12 | 1 | Yes | 100 | 80 |                       |
| RET_Exon_1929268                                        | 10 | 43617394  | 43617464  | 71   | 9  | 1 | Yes | 100 | 60 |                       |
| SDHAF2_Exon_1833445                                     | 11 | 61197597  | 61197654  | 58   | 15 | 1 | Yes | 100 | 80 |                       |
| SDHAF2_custom-merged                                    | 11 | 61205082  | 61205600  | 519  |    | 3 | Yes | 92  | 91 |                       |
| SDHAF2_3prim_Exon_1840775                               | 11 | 61213413  | 61213694  | 282  | 20 | 3 | Yes | 100 | 66 |                       |
| MEN1_3prim_ex-merged<br><i>Excluded (see main text)</i> | 11 | 64571674  | 64572759  | 1086 | 0  | 0 | No  | 0   | 0  | Excluded <sup>c</sup> |
| MEN1_Exon_1851016                                       | 11 | 64573107  | 64573242  | 136  | 15 | 1 | Yes | 100 | 60 |                       |
| MEN1_Exon_1850844                                       | 11 | 64573704  | 64573840  | 137  | 15 | 1 | Yes | 100 | 80 |                       |
| MEN1_custom-merged                                      | 11 | 64574473  | 64574701  | 229  |    | 2 | Yes | 100 | 78 |                       |
| MEN1_custom-merged                                      | 11 | 64575014  | 64575581  | 568  |    | 4 | Yes | 100 | 75 |                       |
| MEN1_Exon_1850913                                       | 11 | 64577122  | 64577604  | 483  | 15 | 4 | Yes | 100 | 65 |                       |
| SDHD_Exon_1922582                                       | 11 | 111957571 | 111957683 | 113  | 15 | 1 | Yes | 100 | 96 |                       |
| SDHD_Exon_1919386                                       | 11 | 111958581 | 111958697 | 117  | 15 | 1 | Yes | 100 | 96 |                       |
| SDHD_Exon_1920069                                       | 11 | 111959591 | 111959735 | 145  | 15 | 1 | Yes | 100 | 96 |                       |
| SDHD_3'_Exon_1920070                                    | 11 | 111965529 | 111965800 | 272  | 15 | 3 | Yes | 100 | 92 |                       |
| MAX_3prim_Exon_1838797                                  | 14 | 65542958  | 65543381  | 424  | 10 | 3 | Yes | 100 | 79 |                       |
| MAX_Exon_1838095                                        | 14 | 65544631  | 65544754  | 124  | 15 | 1 | Yes | 100 | 80 |                       |
| MAX_Exon_1833728                                        | 14 | 65560426  | 65560533  | 108  | 15 | 1 | Yes | 100 | 80 |                       |
| MAX_Exon_1936492                                        | 14 | 65568264  | 65568290  | 27   | 10 | 1 | Yes | 100 | 80 |                       |
| MAX_Exon_1834823                                        | 14 | 65569022  | 65569227  | 206  | 20 | 2 | Yes | 100 | 70 |                       |
| NF1_Exon_1842979                                        | 17 | 29421945  | 29422387  | 443  | 25 | 4 | Yes | 100 | 60 |                       |
| NF1_Exon_1847907                                        | 17 | 29483001  | 29483144  | 144  | 25 | 2 | Yes | 100 | 96 |                       |
| NF1_Exon_1843057                                        | 17 | 29486028  | 29486111  | 84   | 25 | 1 | Yes | 100 | 96 |                       |
| NF1_Exon_1845671                                        | 17 | 29490204  | 29490394  | 191  | 15 | 2 | Yes | 100 | 98 |                       |
| NF1_Exon_1848458                                        | 17 | 29496909  | 29497015  | 107  | 25 | 1 | Yes | 100 | 96 |                       |

|                     |    |          |          |     |    |   |     |     |    |
|---------------------|----|----------|----------|-----|----|---|-----|-----|----|
| NF1_custom-merged   | 17 | 29508415 | 29508828 | 414 |    | 3 | Yes | 100 | 96 |
| NF1_Exon_1844672    | 17 | 29509526 | 29509683 | 158 | 15 | 2 | Yes | 100 | 95 |
| NF1_Exon_1842980    | 17 | 29527440 | 29527613 | 174 | 25 | 2 | Yes | 100 | 79 |
| NF1_custom-merged   | 17 | 29528030 | 29528528 | 499 |    | 4 | Yes | 100 | 95 |
| NF1_Exon_1847748    | 17 | 29533258 | 29533389 | 132 | 25 | 1 | Yes | 100 | 96 |
| NF1_Exon_1847749    | 17 | 29541469 | 29541603 | 135 | 25 | 1 | Yes | 100 | 96 |
| NF1_Exon_1843198    | 17 | 29546023 | 29546136 | 114 | 25 | 1 | Yes | 100 | 96 |
| NF1_Exon_1844673    | 17 | 29548868 | 29548947 | 80  | 25 | 1 | Yes | 100 | 96 |
| NF1_Exon_1846784    | 17 | 29550462 | 29550585 | 124 | 25 | 1 | Yes | 100 | 96 |
| NF1_Exon_1847750    | 17 | 29552113 | 29552268 | 156 | 25 | 2 | Yes | 100 | 96 |
| NF1_Exon_1845915    | 17 | 29553453 | 29553702 | 250 | 20 | 3 | Yes | 100 | 91 |
| NF1_custom-merged   | 17 | 29554211 | 29554649 | 439 |    | 3 | Yes | 100 | 91 |
| NF1_Exon_1843370    | 17 | 29556043 | 29556483 | 441 | 25 | 3 | Yes | 100 | 96 |
| NF1_Exon_1845672    | 17 | 29556853 | 29556992 | 140 | 15 | 1 | Yes | 100 | 96 |
| NF1_Exon_1849263    | 17 | 29557278 | 29557400 | 123 | 15 | 1 | Yes | 100 | 96 |
| NF1_Exon_1842981    | 17 | 29557860 | 29557943 | 84  | 25 | 1 | Yes | 100 | 98 |
| NF1_Exon_1847908    | 17 | 29559091 | 29559207 | 117 | 25 | 1 | Yes | 100 | 96 |
| NF1_custom-merged   | 17 | 29559693 | 29560256 | 564 |    | 4 | Yes | 100 | 82 |
| NF1_custom-merged   | 17 | 29562604 | 29563064 | 461 |    | 4 | Yes | 100 | 96 |
| NF1_Exon_1843059    | 17 | 29576002 | 29576137 | 136 | 25 | 2 | Yes | 100 | 95 |
| NF1_Exon_2166252    | 17 | 29579956 | 29580018 | 63  | 25 | 1 | Yes | 100 | 96 |
| NF1_Exon_1848460    | 17 | 29585362 | 29585520 | 159 | 25 | 2 | Yes | 100 | 78 |
| NF1_Exon_1845041    | 17 | 29586050 | 29586147 | 98  | 20 | 2 | Yes | 100 | 77 |
| NF1_Exon_1843141    | 17 | 29587387 | 29587533 | 147 | 25 | 2 | Yes | 100 | 98 |
| NF1_Exon_1849265    | 17 | 29588729 | 29588875 | 147 | 25 | 1 | Yes | 100 | 96 |
| NF1_Exon_1845674    | 17 | 29592247 | 29592357 | 111 | 25 | 1 | Yes | 100 | 96 |
| NF1_Exon_1849266    | 17 | 29652838 | 29653270 | 433 | 20 | 3 | Yes | 95  | 85 |
| NF1_Exon_1847752    | 17 | 29654517 | 29654857 | 341 | 25 | 3 | Yes | 100 | 91 |
| NF1_Exon_1843475    | 17 | 29657314 | 29657516 | 203 | 25 | 2 | Yes | 100 | 78 |
| NF1_Exon_1843142    | 17 | 29661856 | 29662049 | 194 | 20 | 2 | Yes | 100 | 78 |
| NF1_custom-merged   | 17 | 29663326 | 29663957 | 632 |    | 4 | Yes | 100 | 98 |
| NF1_custom-merged   | 17 | 29664366 | 29665177 | 812 |    | 6 | Yes | 100 | 90 |
| NF1_Exon_1846508    | 17 | 29665722 | 29665823 | 102 | 25 | 1 | Yes | 100 | 96 |
| NF1_Exon_1847279    | 17 | 29667523 | 29667663 | 141 | 25 | 2 | Yes | 100 | 96 |
| NF1_Exon_1849267    | 17 | 29670027 | 29670153 | 127 | 25 | 1 | Yes | 100 | 98 |
| NF1_Exon_1843200    | 17 | 29676138 | 29676269 | 132 | 25 | 1 | Yes | 100 | 95 |
| NF1_Exon_1847753    | 17 | 29677201 | 29677336 | 136 | 25 | 1 | Yes | 100 | 95 |
| NF1_Exon_1843371    | 17 | 29679275 | 29679432 | 158 | 25 | 2 | Yes | 100 | 79 |
| NF1_Exon_1844675    | 17 | 29683478 | 29683600 | 123 | 25 | 1 | Yes | 100 | 96 |
| NF1_custom-merged   | 17 | 29683953 | 29684412 | 460 |    | 4 | Yes | 100 | 87 |
| NF1_Exon_1849268    | 17 | 29685498 | 29685640 | 143 | 25 | 2 | Yes | 100 | 97 |
| NF1_Exon_1844676    | 17 | 29685987 | 29686033 | 47  | 25 | 1 | Yes | 100 | 95 |
| NF1_Exon_1843201    | 17 | 29687505 | 29687721 | 217 | 20 | 2 | Yes | 100 | 77 |
| NF1_3' Exon_1843143 | 17 | 29701031 | 29701440 | 410 | 25 | 4 | Yes | 100 | 78 |

Chr, Chromosome; bp, base pairs; DS score, DesignStudio score estimating the relative enrichment performance (0-100) of each amplicon compared to all other amplicons in the pool.

<sup>a</sup>Padding refers to the number of flanking nucleotides that are included in the design for each exon to cover the exon-intron boundary. Between 10 and 25 nucleotides upstream and downstream of each exon were generally included, with the exception of long 5'- and 3'-UTRs, where the translation start site and stop site flanks were covered instead. Shorter flanking regions were allowed for the proto-oncogene *RET* and for two additional exons (in *KIF1B* and *SDHC*) where design was otherwise not possible. Exon positions were automatically derived from hg19 in DesignStudio (Illumina) except for regions termed "custom-merged" which were defined manually in the software to allow merging of adjacent exons and their flanking regions.

<sup>b</sup>SNPs allowed due to difficult target.

<sup>c</sup>Excluded after several designs had been attempted.

**Table S4.** Missense variants of unknown pathogenic significance identified by next-generation sequencing in 72 pheochromocytomas and 14 paragangliomas.

| Sample(s)             | Gene          | Variant<br>Nucleotide, protein        | Predicted mutation impact |                 | Allele<br>frequency<br>in cohort | Population<br>allele<br>frequency <sup>a</sup> |
|-----------------------|---------------|---------------------------------------|---------------------------|-----------------|----------------------------------|------------------------------------------------|
|                       |               |                                       | PolyPhen-2                | MutationTaster  |                                  |                                                |
| 49                    | <i>VHL</i>    | rs35460768<br>c.74C>T, p.Pro25Leu     | Probably benign (0.000)   | Polymorphism    | 0.006                            | 0.004                                          |
| 3, 47, 61,<br>65      | <i>SDHB</i>   | rs33927012<br>c.487T>C, p.Ser163Pro   | Probably benign (0.000)   | Disease causing | 0.023                            | 0.013                                          |
| 18                    | <i>SDHD</i>   | rs34677591<br>c.34G>A, p.Gly12Ser     | Probably benign (0.005)   | Disease causing | 0.006                            | 0.011                                          |
| 20, 85, 89,<br>93, 96 | <i>KIF1Bβ</i> | rs77172218<br>c.4660G>A, p.Val1554Met | Probably benign (0.005)   | Disease causing | 0.029                            | 0.017                                          |
| 17, 85, 100           | <i>MEN1</i>   | rs607969<br>c.512G>A, p.Arg171Gln     | Probably damaging (0.995) | Polymorphism    | 0.017                            | 0.020                                          |

Nucleotide and protein nomenclature were based on the following Ensembl transcript identifiers: *KIF1Bβ*: ENST00000263934, *MEN1*: ENST00000312049, *SDHB*: ENST00000375499, *SDHD*: ENST00000375549, *VHL*: ENST00000256474. The two prediction algorithms gave contradictory results for four of the five variants. The pathogenicity of the variant rs607969 (Arg171Gln) in *MEN1* has previously been disputed (20, 21).

<sup>a</sup>Population frequencies refer to a summary of all reported individuals of European ancestry in Ensembl. Two-tailed Fisher's exact tests were performed to compare allele frequencies between the cohort and the reported population, but no significant differences were found.

**Table S5.** Sanger sequencing of *NFI* exons that did not yield results with next-generation sequencing.

| Exon | Forward primer<br>(5'-3')                   | Reverse primer<br>(5'-3')              | Annealing<br>temperature | Taq<br>polymerase   | Number of<br>samples analyzed |
|------|---------------------------------------------|----------------------------------------|--------------------------|---------------------|-------------------------------|
| 1    | CTTGCCTCTTCCCTC<br>ACCTCAGCCTC <sup>a</sup> | ACCCCTCACCTCCC<br>GCCTTGG <sup>a</sup> | 67.5°C                   | MyTaq<br>(Bioline)  | 78/86 <sup>b</sup>            |
| 8    | TTGCTTAAATGAAG<br>TTCCATGTTT                | TGCCTGGTATTATT<br>TTCCCTCT             | 56°C                     | HotStar<br>(Qiagen) | 86/86                         |

<sup>a</sup>Primers for exon 1 were designed according to a previous study (22).

<sup>b</sup>The *NFI* exon 1 proved difficult to analyze, probably due to the high GC-content of the promoter region overlapping with exon 1. Three different primer pairs were tested with two different enzymes and a temperature gradient (with and without DMSO) before obtaining specific amplification of the correct PCR product. The optimized conditions were: use of the above previously published primers (22), with MyTag polymerase (Bioline), an annealing temperature of 67.5°C and with 5% DMSO in the reaction mixture. For unknown reasons, amplification was not possible for eight samples.

**Table S6.** Mutations identified by next-generation sequencing in pheochromocytomas (PCCs) and paragangliomas (PGLs) from cases with syndromic disease or known germline mutations.

| Sample | Tumor type | Clinical syndrome | Gene                        | Mutation                | Protein alteration                                                |
|--------|------------|-------------------|-----------------------------|-------------------------|-------------------------------------------------------------------|
| 5      | PCC        | MEN2A             | <i>RET</i>                  | c.1900T>G               | p.Cys634Gly                                                       |
| 13     | PCC        | MEN2A             | <i>RET</i>                  | c.1900T>G               | p.Cys634Gly                                                       |
| 23     | PCC        | MEN2A             | <i>RET</i>                  | c.1900T>G               | p.Cys634Gly                                                       |
| 30     | PCC        | MEN2A             | <i>RET</i>                  | c.1900T>G               | p.Cys634Gly                                                       |
| 31     | PCC        | MEN2A             | <i>RET</i>                  | c.1900T>C               | p.Cys634Arg                                                       |
| 34     | PCC        | MEN2A             | <i>RET</i>                  | c.1900T>C               | p.Cys634Arg                                                       |
| 63     | PCC        | MEN2A             | <i>RET</i>                  | c.1900T>C               | p.Cys634Arg                                                       |
| 72     | PCC        | MEN2A             | <i>RET</i><br><i>NF1</i>    | c.1858T>C<br>c.7891A>G  | p.Cys620Arg<br>p.Thr2631Ala <sup>a</sup>                          |
| 81     | PCC        | MEN2A             | <i>RET</i>                  | c.1900T>G               | p.Cys634Gly                                                       |
| 21     | PCC        | VHL               | <i>VHL</i>                  | c.217C>T                | p.Gln73X                                                          |
| 25     | PCC        | VHL               | <i>VHL</i>                  | c.193T>G                | p.Ser65Ala                                                        |
| 8      | PCC        | NF1               | <i>NF1</i>                  | c.2446C>T               | p.Arg816X                                                         |
| 18     | PCC        | NF1               | <i>NF1</i><br><i>KIF1Bβ</i> | c.586+5G>A<br>c.1633G>A | p <sup>?</sup> (splice site mutation)<br>p.Gly545Arg <sup>b</sup> |
| 48     | PCC        | NF1               | <i>NF1</i>                  | c.1971dupT              | p.Leu658fs                                                        |
| 101    | PGL        | (PGL4)            | <i>SDHB</i>                 | c.190delG               | Asp64fs                                                           |
| 102    | PGL        | (PGL4)            | <i>SDHB</i>                 | c.423+1G>A              | p <sup>?</sup> (splice site mutation)                             |
| 103    | PGL        | (PGL4)            | <i>SDHB</i>                 | c.148_151dupGACA        | p.Lys51fs                                                         |
| 113    | PGL        | (PGL4)            | <i>SDHB</i>                 | c.148_151dupGACA        | p.Lys51fs                                                         |

Nucleotide and protein nomenclature were based on the following Ensembl transcript identifiers: *KIF1Bβ*: ENST00000263934, *NF1*: ENST00000358273, *RET*: ENST00000355710, *SDHB*: ENST00000375499, *VHL*: ENST00000256474. All mutations were verified with Sanger sequencing and were, as expected, also detected in constitutional DNA (Figure S1), with the exception of case 25 where only tumor DNA was available. Nine cases carried *RET* missense mutations involving codon 634 in eight cases and codon 620 in one case, in agreement with the common alterations of *RET* exon 11 in MEN2. Two cases were identified with *VHL* mutations, three with *NF1* mutations and four with *SDHB* mutations. In addition, one of the *NF1*-associated tumors harboured a somatic missense *KIF1Bβ* mutation predicted to be damaging. One of the MEN2A cases also harboured a probably benign *NF1* variant in addition to the *RET* mutation.

<sup>a</sup>The *NF1* mutation was germline and was predicted as benign by PolyPhen (score 0.000), but as disease causing by MutationTaster. It has previously been reported as the only detected mutation in a patient with Neurofibromatosis type 1 (23).

<sup>b</sup>The *KIF1Bβ* mutation was somatic (not present in constitutional DNA) and was predicted as probably damaging by PolyPhen (score 1.000) and as disease causing by MutationTaster.

**Table S7.** Sensitivity control samples with previously defined *NF1* alterations<sup>a</sup> (not included in the study cohort).

| Sample | Tumor type | Clinical syndrome | Gene       | Mutation                 |
|--------|------------|-------------------|------------|--------------------------|
| PH12   | PCC        | NF1               | <i>NF1</i> | c.5609G>A                |
| PH3    | PCC        | Sporadic          | <i>NF1</i> | c.1721+3A>T              |
| PH4    | PCC        | Sporadic          | <i>NF1</i> | No mutation <sup>b</sup> |

<sup>a</sup>Samples were analyzed for *NF1* in a previous study, with the same results (6).

<sup>b</sup>In agreement with previous copy number results (6), allelic imbalance for SNPs may indicate LOH at the *NF1* locus in this sample. For example, the three first (in base pair position) heterozygous SNPs had the following read frequencies of the two alleles: rs2269855: 69.1% A, 30.9% G; rs2952976: 64.7% A, 35.3% G; rs1801052: 82.7% A, 17.3% G.

**Table S8.** Number of sequencing reads for mutations detected with next-generation sequencing of tumor DNA.

| Sample | Gene           | Mutation           | Position <sup>a</sup><br>[Chr:bp] | Total number of reads covering the locus (depth) | Proportion of reads with mutated allele |
|--------|----------------|--------------------|-----------------------------------|--------------------------------------------------|-----------------------------------------|
| 96     | <i>EGLN1</i>   | c.799G>A           | 1:231556836                       | 1178                                             | 0.462                                   |
| 7      | <i>KIF1Bβ</i>  | c.2504A>G          | 1:10384920                        | 1068                                             | 0.494                                   |
| 18     | <i>KIF1Bβ</i>  | c.1633G>A          | 1:10355818                        | 1393                                             | 0.234                                   |
| 86     | <i>MAX</i>     | c.97C>T            | 14:65560500                       | 1249                                             | 0.364                                   |
| 8      | <i>NF1</i>     | c.2446C>T          | 17:29556079                       | 2632                                             | 0.870                                   |
| 18     | <i>NF1</i>     | c.586+5G>A         | 17:29497020                       | 1091                                             | 0.786                                   |
| 20     | <i>NF1</i>     | c.1413_1440del     | 17:29541484                       | 1664                                             | 0.722                                   |
| 24     | <i>NF1</i>     | c.935delG          | 17:29527484                       | 2305                                             | 0.294                                   |
| 38     | <i>NF1</i>     | c.879delC          | 17:29509673                       | 967                                              | 0.855                                   |
| 39     | <i>NF1</i>     | c.3638_3700delinsA | 17:29560177                       | 956                                              | 0.675                                   |
| 44     | <i>NF1</i>     | c.1340T>C          | 17:29533337                       | 776                                              | 0.376                                   |
| 47     | <i>NF1</i>     | c.7901_7924del     | 17:29684316                       | 1605                                             | 0.596                                   |
| 48     | <i>NF1</i>     | c.1971dupT         | 17:29552237                       | 614                                              | 0.932                                   |
| 52     | <i>NF1</i>     | c.5327_5375dup     | 17:29654574                       | 627                                              | 0.349                                   |
| 61     | <i>NF1</i>     | c.2806A>T          | 17:29556439                       | 1450                                             | 0.694                                   |
| 72     | <i>NF1</i>     | c.7891A>G          | 17:29684308                       | 1700                                             | 0.490                                   |
| 77     | <i>NF1</i>     | c.5123delT         | 17:29653121                       | 1339                                             | 0.815                                   |
| 83     | <i>NF1</i>     | c.3354_3375del     | 17:29559743                       | 1708                                             | 0.548                                   |
| 86     | <i>NF1</i>     | c.4174-2A>T        | 17:29585360                       | 1264                                             | 0.573                                   |
| 89     | <i>NF1</i>     | c.3232delT         | 17:29559122                       | 436                                              | 0.374                                   |
| 93     | <i>NF1</i>     | c.5991G>A          | 17:29662034                       | 1266                                             | 0.476                                   |
| 5      | <i>RET</i>     | c.1900C>G          | 10:43609948                       | 1106                                             | 0.582                                   |
| 13     | <i>RET</i>     | c.1900C>G          | 10:43609948                       | 756                                              | 0.519                                   |
| 23     | <i>RET</i>     | c.1900C>G          | 10:43609948                       | 811                                              | 0.527                                   |
| 26     | <i>RET</i>     | c.2753T>C          | 10:43617416                       | 1094                                             | 0.334                                   |
| 29     | <i>RET</i>     | c.2753T>C          | 10:43617416                       | 1082                                             | 0.401                                   |
| 30     | <i>RET</i>     | c.1900C>G          | 10:43609948                       | 932                                              | 0.589                                   |
| 31     | <i>RET</i>     | c.1900T>C          | 10:43609948                       | 743                                              | 0.510                                   |
| 34     | <i>RET</i>     | c.1900T>C          | 10:43609948                       | 776                                              | 0.537                                   |
| 43     | <i>RET</i>     | c.2372A>T          | 10:43613908                       | 946                                              | 0.451                                   |
| 63     | <i>RET</i>     | c.1900T>C          | 10:43609948                       | 806                                              | 0.455                                   |
| 64     | <i>RET</i>     | c.2694_2705del     | 10:43615611                       | 888                                              | 0.322                                   |
| 72     | <i>RET</i>     | c.1858T>C          | 10:43609102                       | 364                                              | 0.659                                   |
| 81     | <i>RET</i>     | c.1900C>G          | 10:43609948                       | 754                                              | 0.647                                   |
| 95     | <i>SDHA</i>    | c.629G>A           | 5:228307                          | 2374                                             | 0.502                                   |
| 96     | <i>SDHA</i>    | c.223C>T           | 5:224547                          | 990                                              | 0.479                                   |
| 101    | <i>SDHB</i>    | c.190delG          | 1:17371265                        | 881                                              | 0.645                                   |
| 102    | <i>SDHB</i>    | c.423+1G>A         | 1:17355094                        | 808                                              | 0.869                                   |
| 103    | <i>SDHB</i>    | c.148_151dupGACA   | 1:17371304                        | 789                                              | 0.559                                   |
| 105    | <i>SDHB</i>    | c.683_684delAG     | 1:17349183                        | 848                                              | 0.460                                   |
| 113    | <i>SDHB</i>    | c.148_151dupGACA   | 1:17371304                        | 666                                              | 0.732                                   |
| 87     | <i>TMEM127</i> | c.665C>T           | 2:96919598                        | 610                                              | 0.361                                   |
| 21     | <i>VHL</i>     | c.217C>T           | 3:10183748                        | 141                                              | 0.440                                   |
| 25     | <i>VHL</i>     | c.193T>G           | 3:10183724                        | 103                                              | 0.418                                   |
| 96     | <i>VHL</i>     | c.386T>C           | 3:10188243                        | 457                                              | 0.578                                   |
| 108    | <i>VHL</i>     | c.593T>G           | 3:10191600                        | 1010                                             | 0.283                                   |

<sup>a</sup>Base pair positions are according to hg19. For alterations affecting several base pairs, the first affected position is listed.

Chr, chromosome; bp, base pair

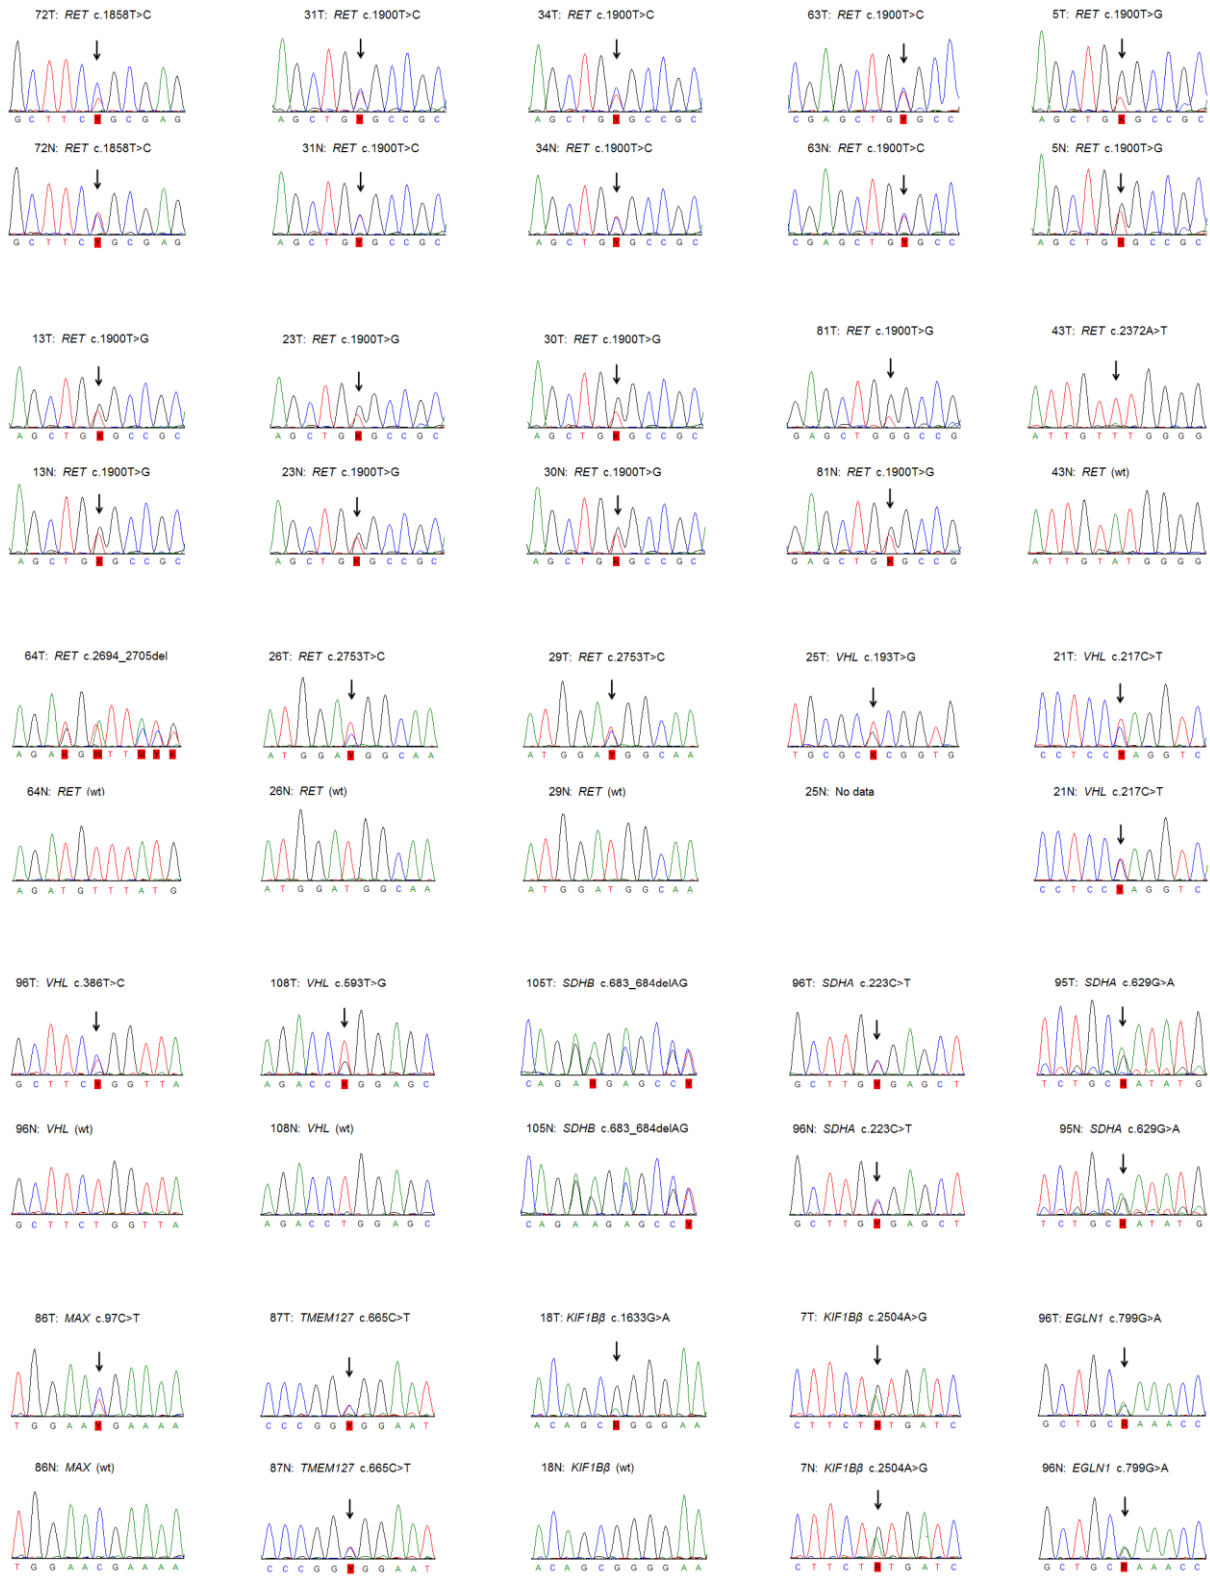

**Figure S1.** Sanger sequencing results for validation of mutations and investigation in corresponding constitutional DNA. *Continued on page 16.*

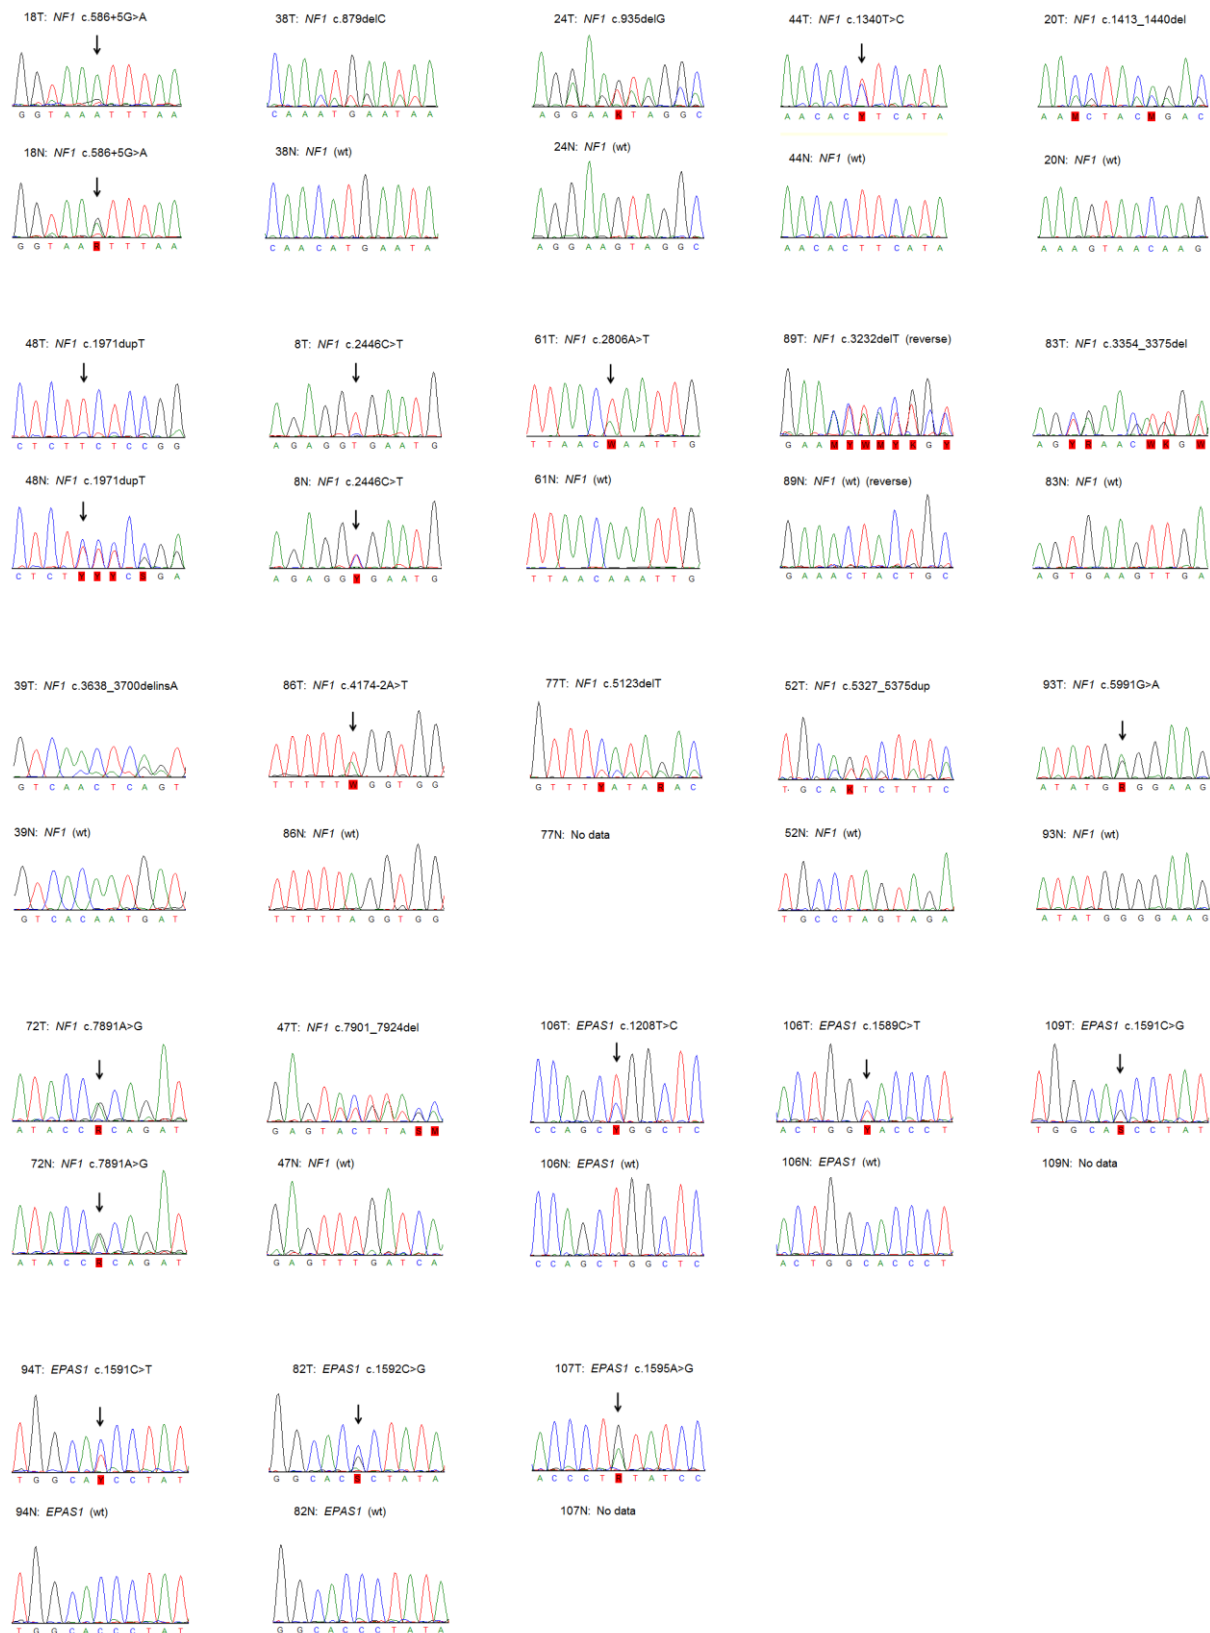

**Figure S1.** Sanger sequencing results for validation of mutations and investigation in corresponding constitutional DNA. *Continued from page 15.*



Sample 18: *NF1* exon 5 missing (reverse)

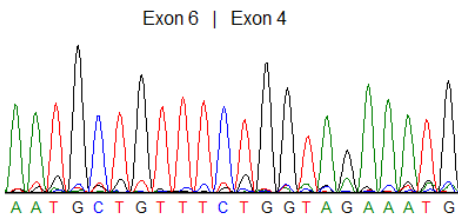

Sample 86: *NF1* exon 32 missing

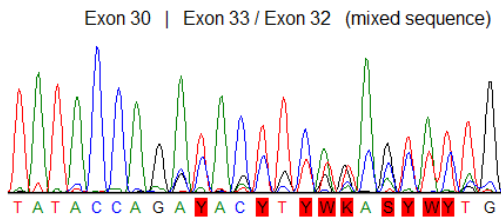

**Figure S2.** Validation of splice-site mutations by sequencing of *NF1* cDNA.

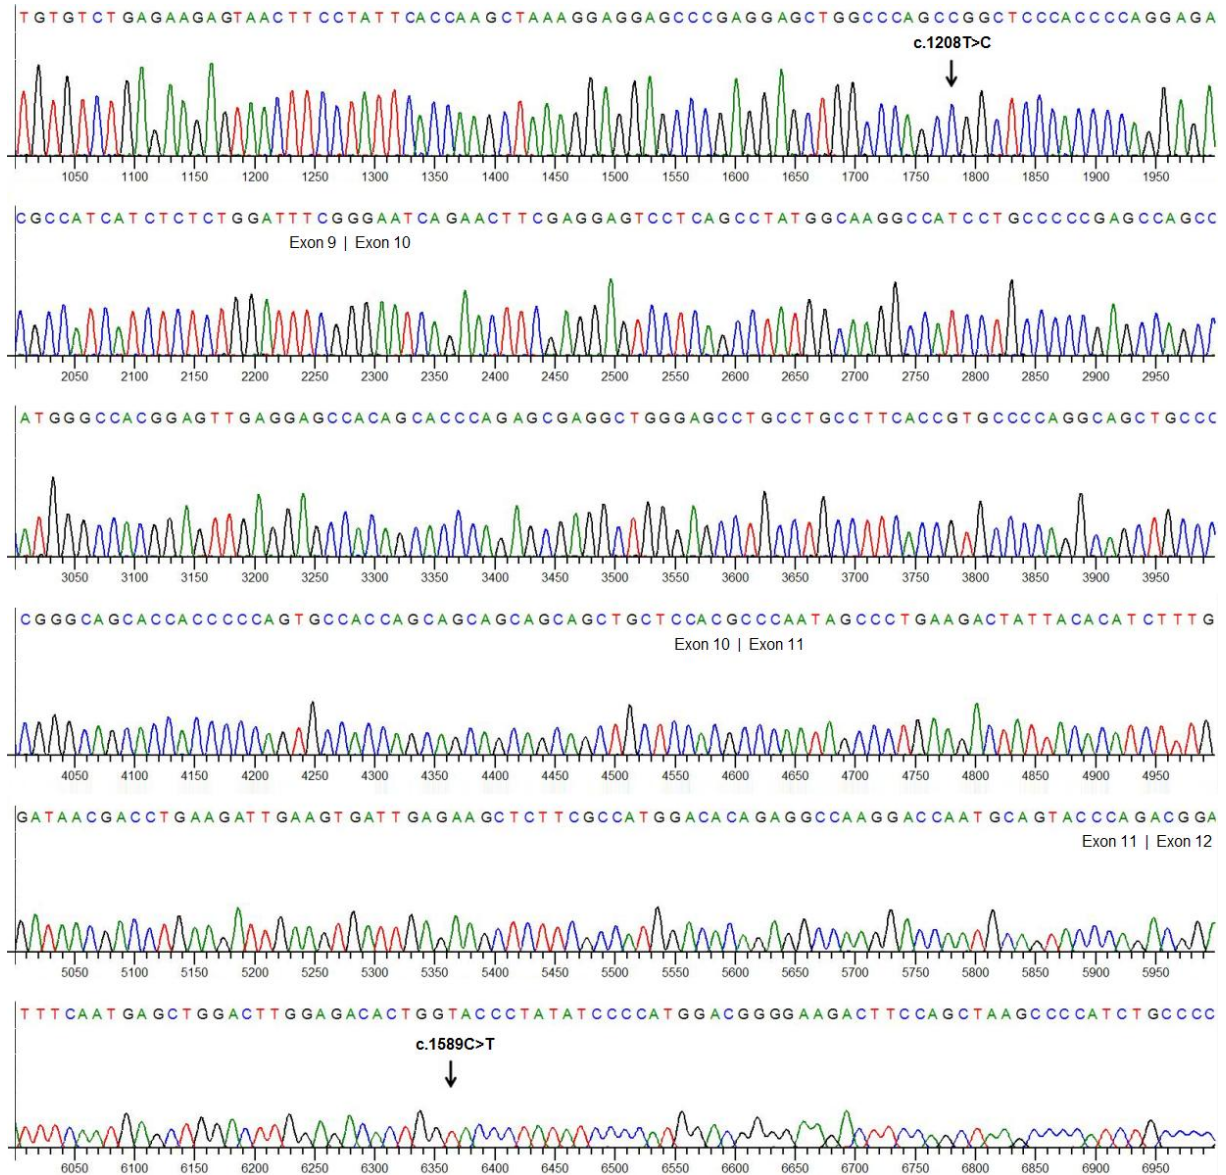

**Figure S3.** Sequencing results after molecular cloning of *EPAS1* cDNA from a tumor carrying two different somatic mutations (sample 106). The two mutations, c.1208T>C (Leu403Pro) and c.1589C>T (Ala530Val) were present in the same clone, implying that they occur in *cis*.

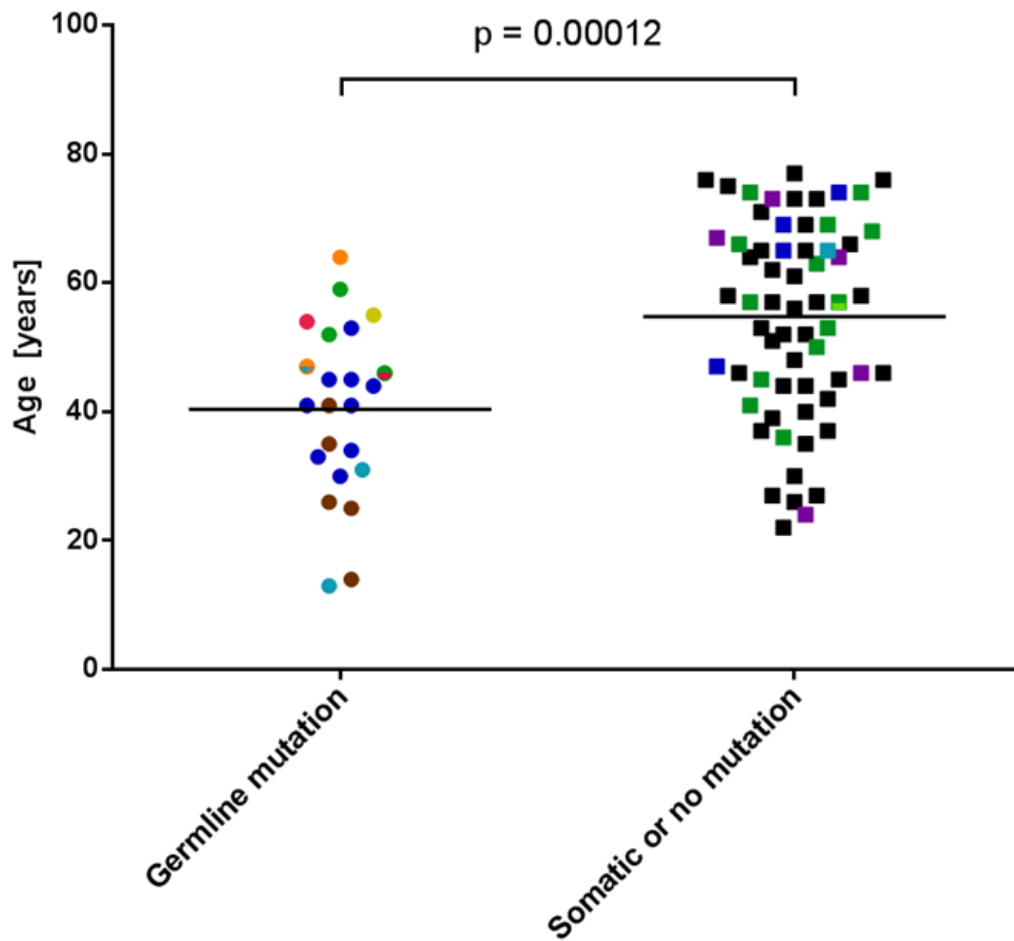

**Figure S4.** Age (at surgery) of patients with pheochromocytoma and paraganglioma. The difference between those with and without germline mutations was assessed with a two-tailed t-test. Cases with germline or somatic mutations are color-coded as follows (in conformity with Figure 1 in the main article): dark blue=*RET*, light blue=*VHL*, dark green=*NF1*, light green=*MAX*, orange=*SDHA*, brown=*SDHB*, yellow=*TMEM127*, gray=*EGLN1*, pink=*KIF1B $\beta$* , violet=*EPAS1*, black=no detected mutation (samples with multiple colors have more than one mutation). Horizontal bars indicate mean values for each group.

## Supplementary references

1. **Kiss NB, Muth A, Andreasson A, Juhlin CC, Geli J, Backdahl M, Hoog A, Wangberg B, Nilsson O, Ahlman H, Larsson C.** Acquired hypermethylation of the P16INK4A promoter in abdominal paraganglioma: relation to adverse tumor phenotype and predisposing mutation. *Endocr Relat Cancer* 2013; 20:65-78.
2. **Edstrom E, Mahlamaki E, Nord B, Kjellman M, Karhu R, Hoog A, Goncharov N, Teh BT, Backdahl M, Larsson C.** Comparative genomic hybridization reveals frequent losses of chromosomes 1p and 3q in pheochromocytomas and abdominal paragangliomas, suggesting a common genetic etiology. *Am J Pathol* 2000; 156:651-659.
3. **Andreasson A, Kiss NB, Caramuta S, Sulaiman L, Svahn F, Backdahl M, Hoog A, Juhlin CC, Larsson C.** The VHL gene is epigenetically inactivated in pheochromocytomas and abdominal paragangliomas. *Epigenetics* 2013; 8:1347-54.
4. **DeLellis RA, Lloyd RV, Heitz PU, Eng C.** Pathology and Genetics of Tumours of Endocrine Organs. In: *World Health Organization Classification of Tumours*. Lyon: IARC Press; 2004; 147-150.
5. **Lack EE.** Tumors of the adrenal glands and extraadrenal paraganglia. In: *AFIP Atlas of Tumor Pathology*. Washington, D.C: American Registry of Pathology in collaboration with the Armed Forces Institute of Pathology (U.S.); 2007; 274-276.
6. **Welander J, Larsson C, Backdahl M, Hareni N, Sivler T, Brauckhoff M, Soderkvist P, Gimm O.** Integrative genomics reveals frequent somatic NF1 mutations in sporadic pheochromocytomas. *Hum Mol Genet* 2012; 21:5406-5416.
7. **Andreasson A, Kiss NB, Juhlin CC, Höög A.** Long-term storage of endocrine tissues at -80 °C does not adversely affect RNA quality or overall histomorphology. *Biopreserv Biobank* 2013; 11:366-370.
8. **Margraf RL, Crockett DK, Krautscheid PM, Seamons R, Calderon FR, Wittwer CT, Mao R.** Multiple endocrine neoplasia type 2 RET protooncogene database: repository of MEN2-associated RET sequence variation and reference for genotype/phenotype correlations. *Hum Mutat* 2009; 30:548-556.
9. **Adzhubei IA, Schmidt S, Peshkin L, Ramensky VE, Gerasimova A, Bork P, Kondrashov AS, Sunyaev SR.** A method and server for predicting damaging missense mutations. *Nat Methods* 2010; 7:248-249.
10. **Schwarz JM, Rodelsperger C, Schuelke M, Seelow D.** MutationTaster evaluates disease-causing potential of sequence alterations. *Nat Methods* 2010; 7:575-576.
11. **Robinson JT, Thorvaldsdottir H, Winckler W, Guttman M, Lander ES, Getz G, Mesirov JP.** Integrative genomics viewer. *Nat Biotechnol* 2011; 29:24-26.
12. **Eisenhofer G, Huynh TT, Pacak K, Brouwers FM, Walther MM, Linehan WM, Munson PJ, Mannelli M, Goldstein DS, Elkahloun AG.** Distinct gene expression profiles in norepinephrine- and epinephrine-producing hereditary and sporadic pheochromocytomas: activation of hypoxia-driven angiogenic pathways in von Hippel-Lindau syndrome. *Endocr Relat Cancer* 2004; 11:897-911.
13. **Dahia PL, Ross KN, Wright ME, Hayashida CY, Santagata S, Barontini M, Kung AL, Sanso G, Powers JF, Tischler AS, Hodin R, Heitritter S, Moore F, Dluhy R, Sosa JA, Ocal IT, Benn DE, Marsh DJ, Robinson BG, Schneider K, Garber J, Arum SM, Korbonits M, Grossman A, Pigny P, Toledo SP, Nose V, Li C, Stiles CD.** A HIF1alpha regulatory loop links hypoxia and mitochondrial signals in pheochromocytomas. *PLoS Genet* 2005; 1:72-80.
14. **Burnichon N, Vescovo L, Amar L, Libe R, de Reynies A, Venisse A, Jouanno E, Laurendeau I, Parfait B, Bertherat J, Plouin PF, Jeunemaitre X, Favier J, Gimenez-**

- Roqueplo AP.** Integrative genomic analysis reveals somatic mutations in pheochromocytoma and paraganglioma. *Hum Mol Genet* 2011; 20:3974-3985.
15. **Lopez-Jimenez E, Gomez-Lopez G, Leandro-Garcia LJ, Munoz I, Schiavi F, Montero-Conde C, de Cubas AA, Ramirez R, Landa I, Leskela S, Maliszewska A, Inglada-Perez L, de la Vega L, Rodriguez-Antona C, Leton R, Bernal C, de Campos JM, Diez-Tascon C, Fraga MF, Boullosa C, Pisano DG, Opocher G, Robledo M, Cascon A.** Research resource: Transcriptional profiling reveals different pseudohypoxic signatures in SDHB and VHL-related pheochromocytomas. *Mol Endocrinol* 2010; 24:2382-2391.
  16. **Dahia PL.** Pheochromocytoma and paraganglioma pathogenesis: learning from genetic heterogeneity. *Nat Rev Cancer* 2014; 14:108-19.
  17. **Rozen S, Skaletsky H.** Primer3 on the WWW for general users and for biologist programmers. *Methods Mol Biol* 2000; 132:365-386.
  18. **Aranyi T, Varadi A, Simon I, Tusnady GE.** The BiSearch web server. *BMC Bioinformatics* 2006; 7:431.
  19. **Geli J, Kiss N, Karimi M, Lee JJ, Backdahl M, Ekstrom TJ, Larsson C.** Global and regional CpG methylation in pheochromocytomas and abdominal paragangliomas: association to malignant behavior. *Clin Cancer Res* 2008; 14:2551-2559.
  20. **De Carlo E, Pilon C, Zatelli MC, degli Uberti EC, Fallo F.** Isolated R171Q amino acid change in MEN1 gene: polymorphism or mutation? *Clin Endocrinol (Oxf)* 2008; 69:511.
  21. **Lampichler K, Ilhan A, Lang R, Daneva T, Wagner L, Knosp E, Niederle B, Baumgartner-Parzer SM.** Evaluation of MEN1 risk in individuals bearing R171Q. R171Q - single nucleotide polymorphism (SNP) or not SNP - that is the question. *Clin Endocrinol (Oxf)* 2011; 75:274.
  22. **Pasmant E, Sabbagh A, Masliah-Planchon J, Ortonne N, Laurendeau I, Melin L, Ferkal S, Hernandez L, Leroy K, Valeyrie-Allanore L, Parfait B, Vidaud D, Bieche I, Lantieri L, Wolkenstein P, Vidaud M.** Role of noncoding RNA ANRIL in genesis of plexiform neurofibromas in neurofibromatosis type 1. *J Natl Cancer Inst* 2011; 103:1713-1722.
  23. **Upadhyaya M, Maynard J, Osborn M, Huson SM, Ponder M, Ponder BA, Harper PS.** Characterisation of germline mutations in the neurofibromatosis type 1 (NF1) gene. *J Med Genet* 1995; 32:706-710.
